# Supplementary material
Source: MDPI journal article supplement (https://www.mdpi.com/2071-1050/12/15/5876)
Supplement: s1 [file s1]

Electronic Supplementary Information (ESI)

# Effective Harmful Organism Management I: Fabrication of Facile and Robust Superhydrophobic Coating on Fabric

Chang-Ho Choi <sup>1</sup>, Yeongwon Kwak <sup>1</sup>, Min kyung Kim <sup>2</sup> and Dong Gun Kim <sup>3,\*</sup>

<sup>1</sup> Department of Chemical Engineering, Gyeongsang National University, Jinju 52828, South Korea; ch\_choi@gnu.ac.kr (C.-H.C.); hyjk755@gnu.ac.kr (Y.K.)

<sup>2</sup> Department of Bio & Environment Technology, Seoul Women's University, Seoul 01797, South Korea; min4190@naver.com

<sup>3</sup> Smith College of Liberal Arts, Sahmyook University, Seoul 01795, South Korea

\* Correspondence: ecology@syu.ac.kr; Tel.: +82-2-3399-1919

## Section 1. Robustness Test Set Up

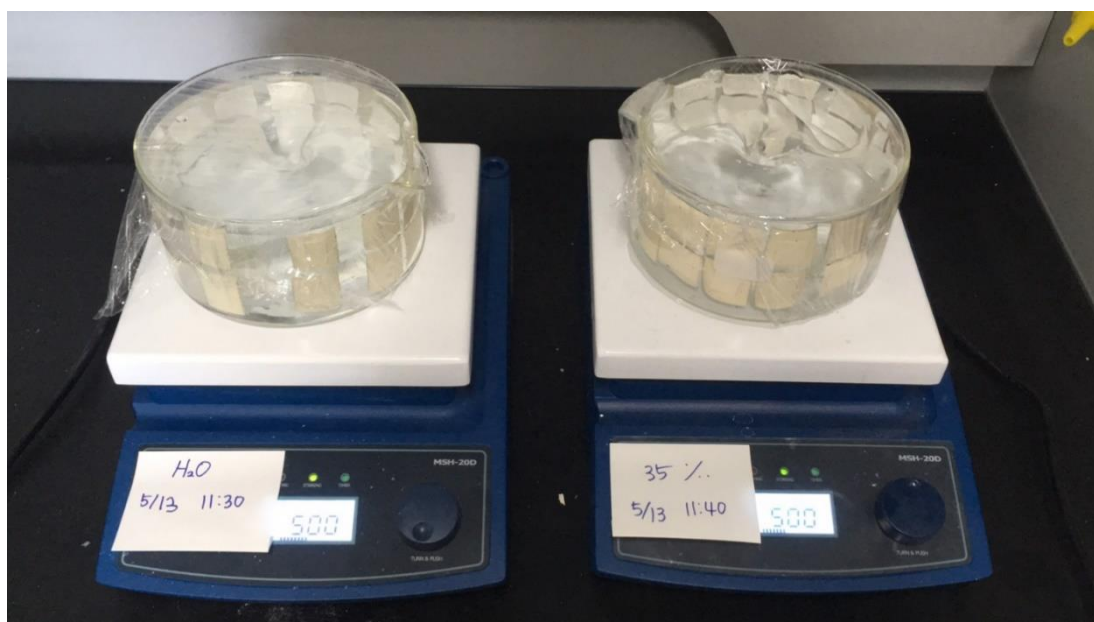

**Figure S1.** Robustness evaluation of the superhydrophobic surfaces: (left) the surfaces immersed in a D.I. water bath and (right) the surfaces immersed in a salted water bath (35 ppt).

Shear stress calculation:

The shear stress could be calculated with some assumptions: (1) the stir bar used to generate rotation frequency is cylindrical, (2) the salty water is pure water, and (3) the samples are equally distanced from the stir bar. The shear rate was calculated by the equation:  $\dot{\gamma} \approx R\omega/d$ , where  $\dot{\gamma}$ ,  $R$ ,  $\omega$ , and  $d$  is shear rate, radius of the stir bar, and rotation frequency, respectively. The shear rate calculated is around  $37.4 \text{ s}^{-1}$ , and the resultant shear stress is around  $8.9 \times 10^{-4} \text{ Pa}$ .

## Section 2. Optical Image of the Coating Material Solution

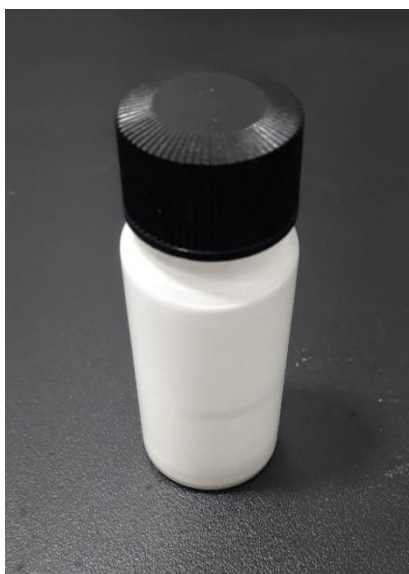

**Figure S2.** Optical image of the coating material solution with white color.

Section 3. SEM Images of TiO<sub>2</sub>-epoxy nanocomposite on Fabric

(a)

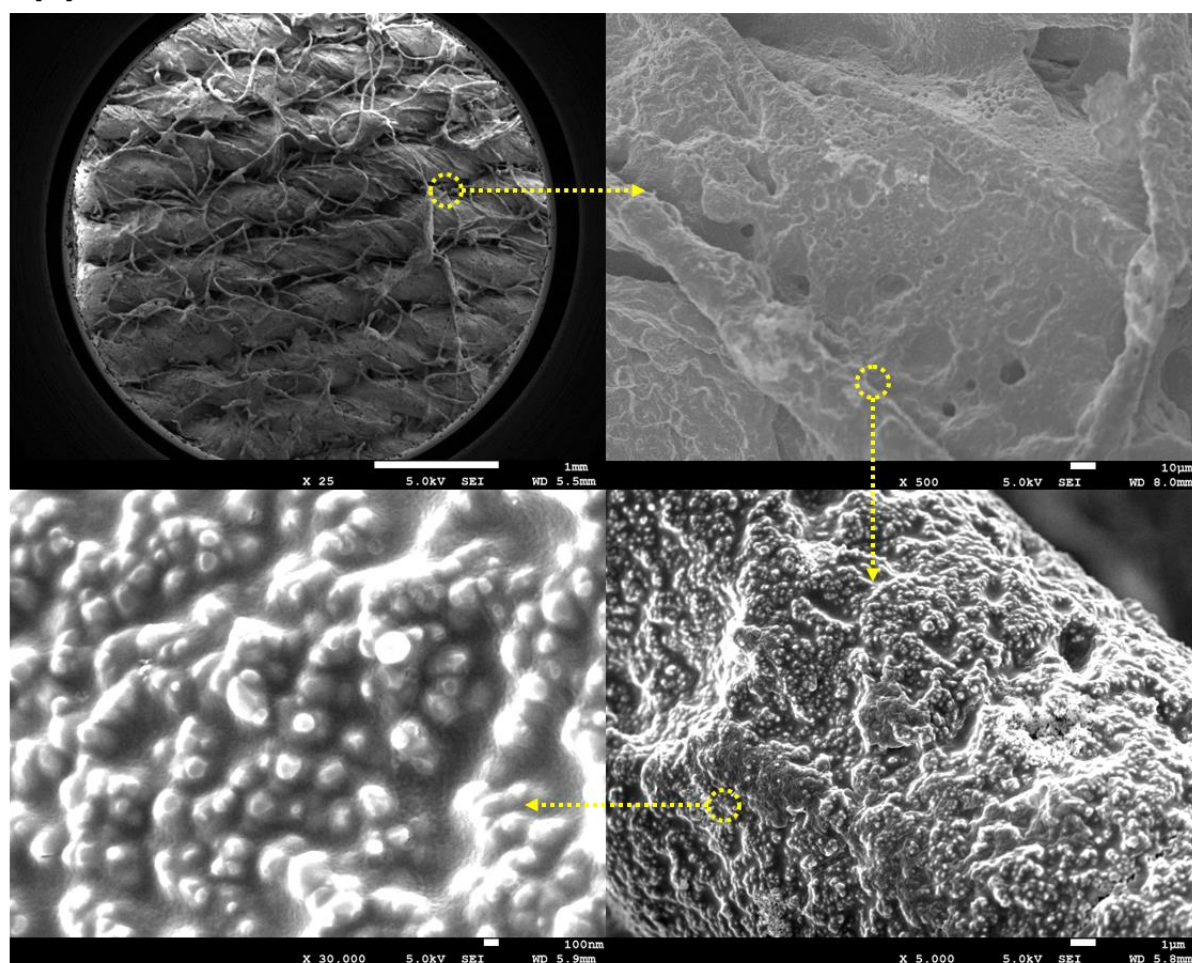

(b)

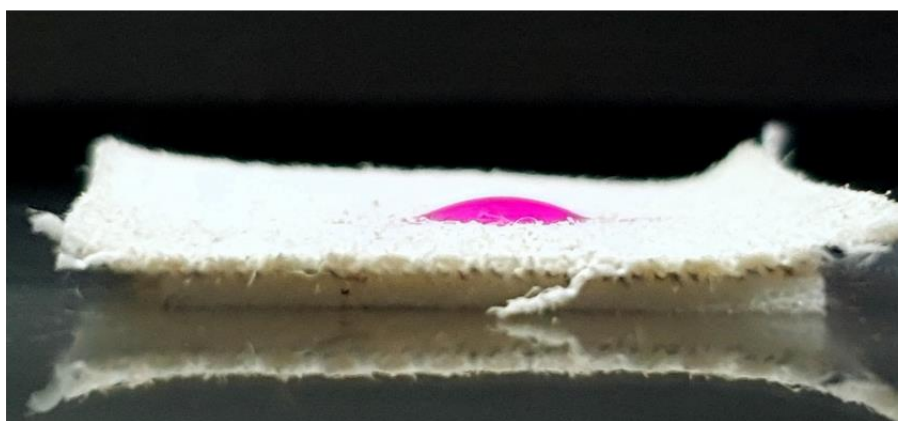

**Figure S3.** (a) SEM images of TiO<sub>2</sub>-epoxy nanocomposite on fabric with different magnification and (b) optical image of water droplet on TiO<sub>2</sub>-epoxy nanocomposite on fabric.



#### Section 4. SEM Images of FC-silane SiO<sub>2</sub> NPs / epoxy resin on Fabric

(a)

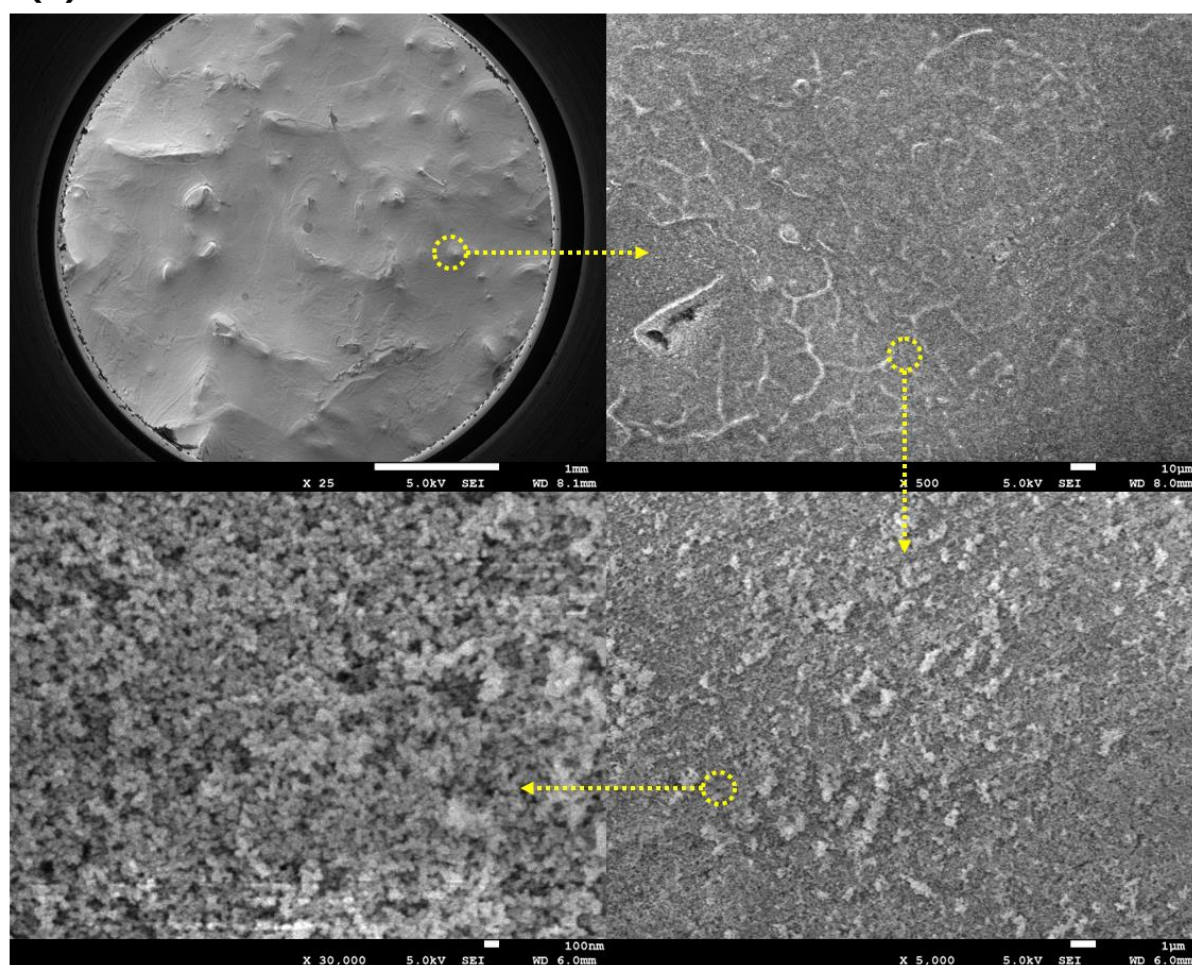

(b)

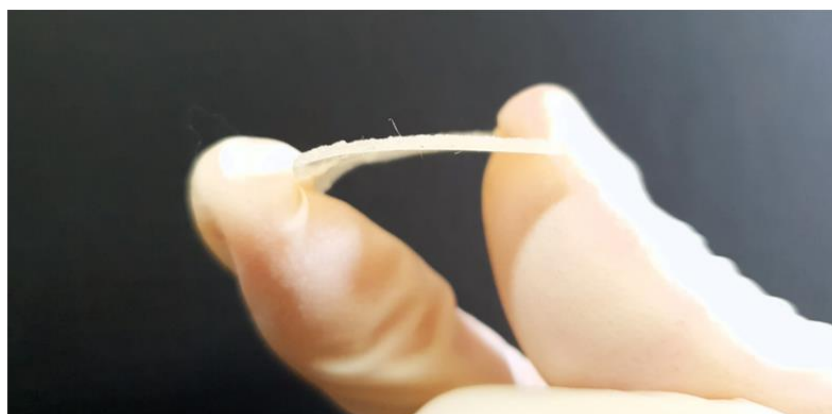

**Figure S4.** (a) SEM images of FC-silane SiO<sub>2</sub> NPs / epoxy resin on fabric with different magnification and (b) flexibility test of FC-silane SiO<sub>2</sub> NPs / epoxy resin sample.

**Section 5. SEM and EDS Images of the Superhydrophobic Surface after the Robustness Test**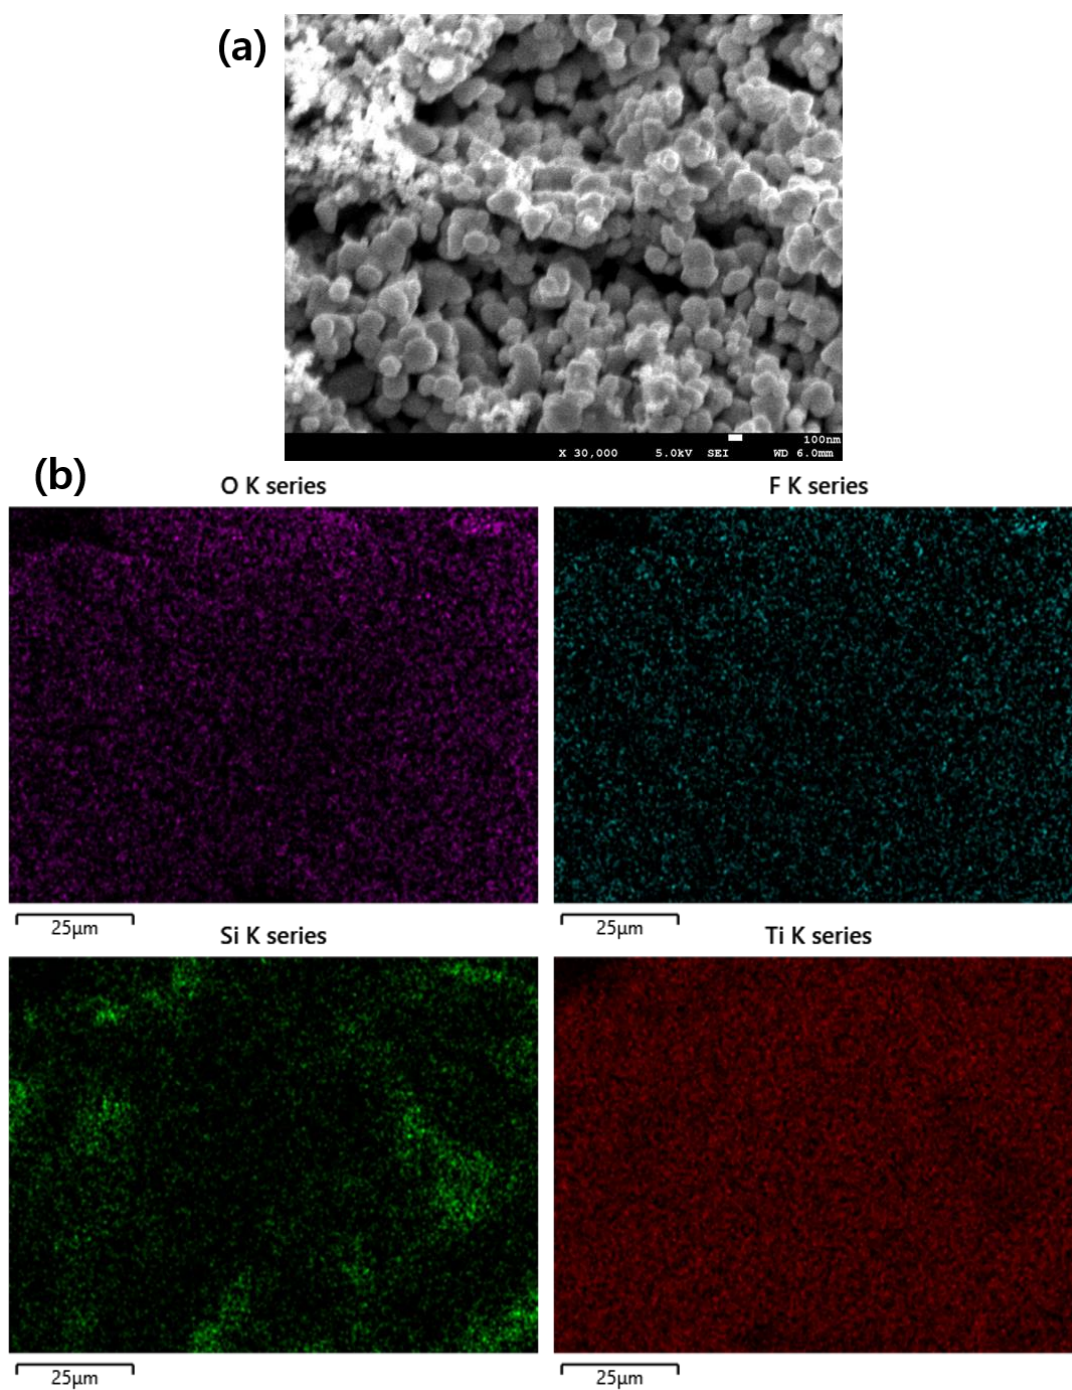

**Figure S5.** (a) SEM images of the superhydrophobic surface and (b) EDS analysis for elemental mapping of oxygen, fluorine, silicon, and titanium.
