# Supplementary material
Source: MDPI journal article supplement (https://www.mdpi.com/2071-1050/12/15/5876)
Supplement: s1 [file s1]

Archive with 4 entries (4 files):
- sustainability-835629-supp_I.pdf
- Video S1.mp4
- Video S2.mp4
- Video S3.mp4
